# Supplementary material for: Facile mechanochemical synthesis of hypervalent tin(iv)-fused azo/azomethine compounds showing solid-state emission
Source: Royal Society of Chemistry journal article supplement (doi:10.1039/d4mr00048j), 2024-01-01
Supplement: d4mr00048j2.pdf [file d4mr00048j2.pdf]

Electronic Supplementary Information

## **Facile Mechanochemical Synthesis of Hypervalent Tin(IV)-Fused Azo/Azomethine Compounds Showing Solid-State Emission**

Masayuki Gon, Taichi Kato, Kazuya Tanimura, Chiaki Hotta and Kazuo Tanaka\*

*Department of Polymer Chemistry, Graduate School of Engineering, Kyoto University Katsura,  
Nishikyo-ku, Kyoto 615-8510, Japan*

E-mail: tanaka@poly.synchem.kyoto-u.ac.jp

| <b>Contents</b>                                            | page |
|------------------------------------------------------------|------|
| DART MS spectra (Fig. S1)                                  | S-2  |
| Solid-state $^{119}\text{Sn}$ CP/MAS NMR spectra (Fig. S2) | S-3  |
| PXRD patterns (Fig. S3)                                    | S-4  |
| Time course profile of mechanochemical reaction (Fig. S4)  | S-4  |

## DART MS spectra

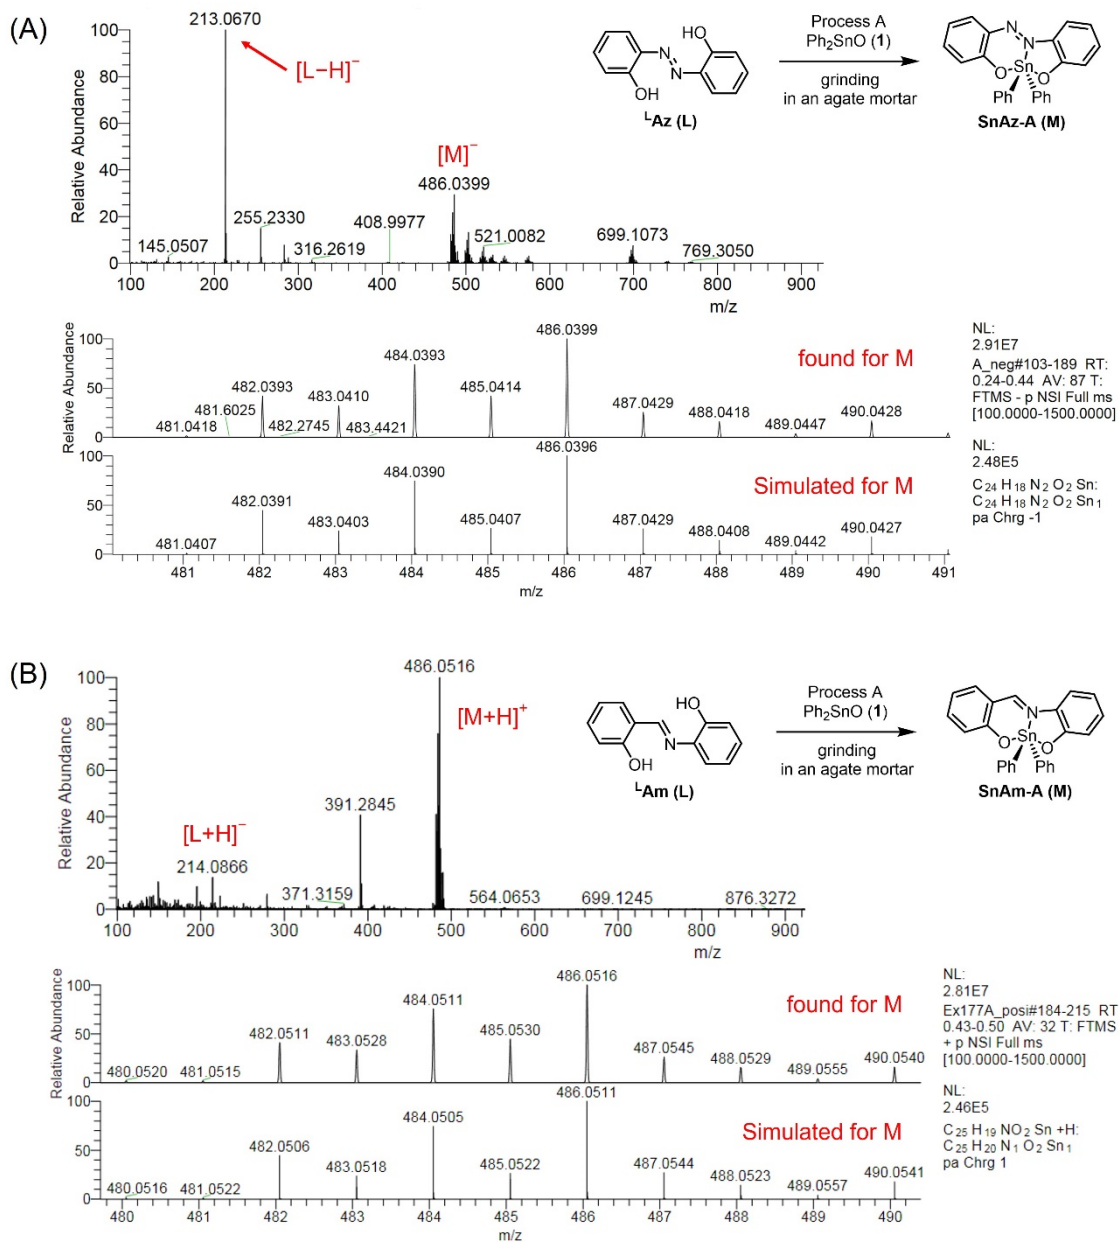

**Fig. S1.** DART MS spectra of SnAz-A and SnAm-A.

### Solid-state $^{119}\text{Sn}$ CP/MAS NMR spectra

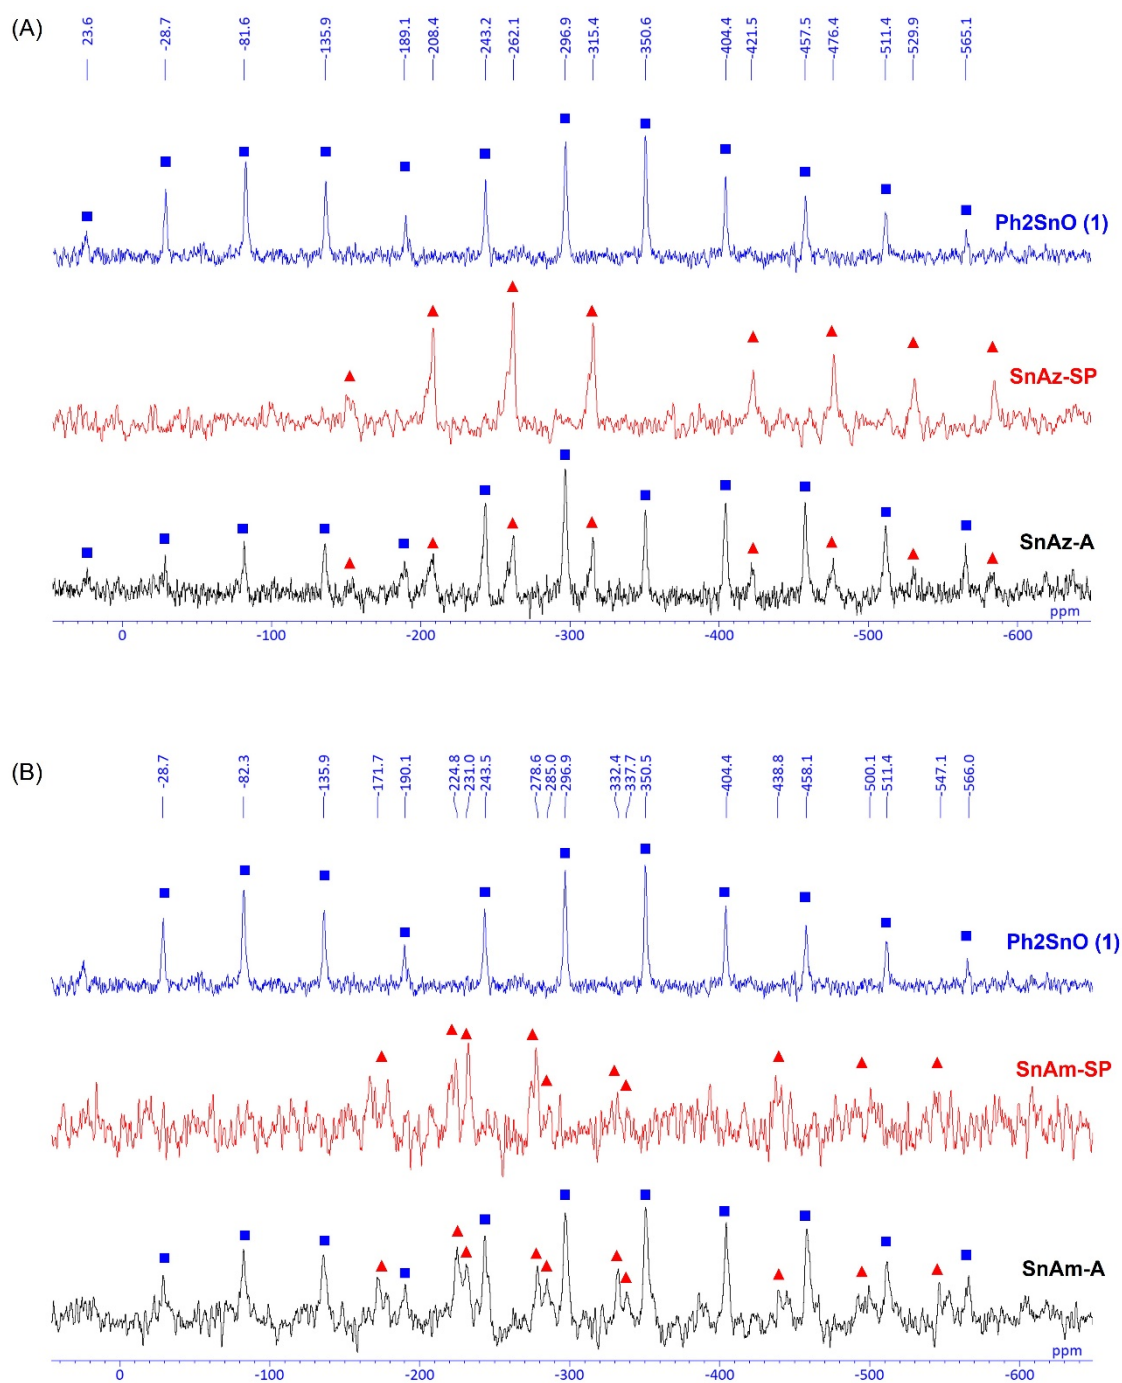

**Fig. S2.** Solid-state  $^{119}\text{Sn}$  CP/MAS NMR spectra of (A)  $\text{Ph}_2\text{SnO}_2$  (**1**),  $\text{SnAz-P}$ , and  $\text{SnAz-A}$ , (B)  $\text{Ph}_2\text{SnO}_2$  (**1**),  $\text{SnAm-SP}$ , and  $\text{SnAm-A}$ . Square (■) and triangle (▲) denote the peaks derived from  $\text{Ph}_2\text{SnO}_2$  (**1**) and  $\text{SnAz-SP}$ , respectively.

## PXRD patterns

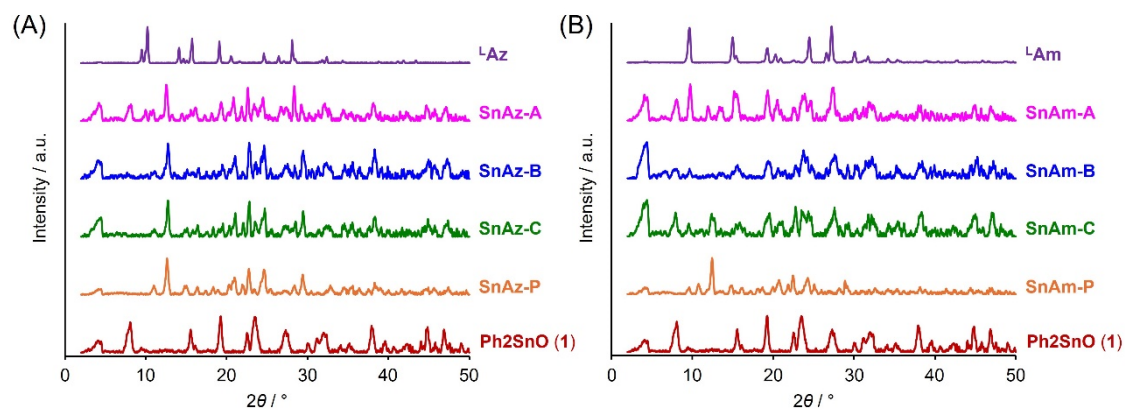

**Fig. S3.** PXRD patterns of (A) <sup>L</sup>Az, SnAz-A, B, C, and SP, and Ph<sub>2</sub>SnO<sub>2</sub> (1), (B) <sup>L</sup>Am, SnAm-A, B, C, and SP, and Ph<sub>2</sub>SnO<sub>2</sub> (1).

## Time course profile of mechanochemical reaction

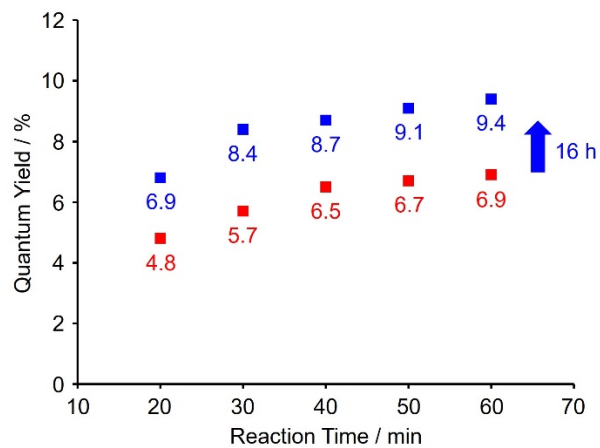

**Fig. S4.** Time course profile of the mechanochemical reaction to prepare SnAm-A. Red squares denote the quantum yields measured just after the mechanochemical reaction. Blue squares denote the quantum yields measured 16 h after the mechanochemical reaction.
